# Supplementary material for: Work-Related Psychosocial Stress in Small and Medium-Sized Enterprises: An Integrative Review
Source: MDPI journal article supplement (doi:10.3390/ijerph17207446), 2020-10-13
Supplement: s1 [file s1]

Supplementary table S3. Allocation to economic sectors according to the International Standard Industrial Classification of All Economic Activities [51].

| Section                                            | Description                                                                                                                | Reference                                               | Total Number (n) |
|----------------------------------------------------|----------------------------------------------------------------------------------------------------------------------------|---------------------------------------------------------|------------------|
| A.                                                 | Agriculture, forestry and fishing                                                                                          | [29]                                                    | 1                |
| B.                                                 | Mining and quarrying                                                                                                       | ---                                                     | 0                |
| C.                                                 | Manufacturing                                                                                                              | [29, 31, 58, 61-65, 67, 71, 73, 74, 84, 87, 89, 94, 96] | 17               |
| D.                                                 | Electricity, gas, steam and air conditioning supply                                                                        | [73]                                                    | 1                |
| E.                                                 | Water supply; sewerage, waste management and remediation activities                                                        | ---                                                     | 0                |
| F.                                                 | Construction                                                                                                               | [29, 67, 73, 77]                                        | 4                |
| G.                                                 | Wholesale and retail trade; repair of motor vehicles and motorcycles                                                       | [59, 68, 77, 82, 95]                                    | 5                |
| H.                                                 | Transportation and storage                                                                                                 | [92]                                                    | 1                |
| I.                                                 | Accommodation and food service activities                                                                                  | [59, 66, 68]                                            | 3                |
| J.                                                 | Information and communication                                                                                              | [31, 66, 75, 76]                                        | 4                |
| K.                                                 | Financial and insurance activities                                                                                         | ---                                                     | 0                |
| L.                                                 | Real estate activities                                                                                                     | ---                                                     | 0                |
| M.                                                 | Professional, scientific and technical activities                                                                          | [58, 60, 97]                                            | 3                |
| N.                                                 | Administrative and support service activities                                                                              | [58, 77]                                                | 2                |
| O.                                                 | Public administration and defense; compulsory social security                                                              | ---                                                     | 0                |
| P.                                                 | Education                                                                                                                  | ---                                                     | 0                |
| Q.                                                 | Human health and social work activities                                                                                    | [77, 78, 83, 85]                                        | 4                |
| R.                                                 | Arts, entertainment and recreation                                                                                         | [31]                                                    | 1                |
| S.                                                 | Other service activities                                                                                                   | [29, 71]                                                | 2                |
| T.                                                 | Activities of households as employers; undifferentiated goods- and services-producing activities of households for own use | ---                                                     | 0                |
| U.                                                 | Activities of extraterritorial organizations and bodies                                                                    | ---                                                     | 0                |
| Service (not specified from author)                |                                                                                                                            | [29, 71, 73]                                            | 3                |
| Several sectors reported (i.e. nationwide surveys) |                                                                                                                            | [30, 57, 70, 72, 73, 92, 93, 98]                        | 8                |
| No sector reported                                 |                                                                                                                            | [69, 79-81, 86, 88, 90]                                 | 7                |
